# Supplementary material
Source: PubMed Central journal article supplement (PMC2750086)

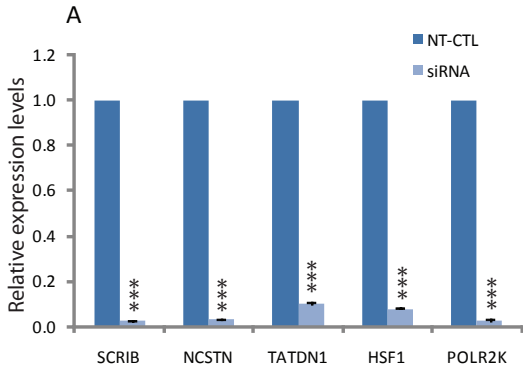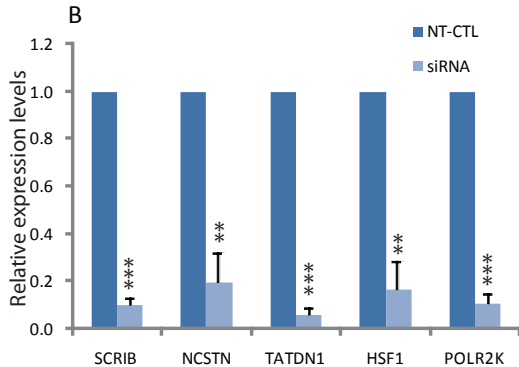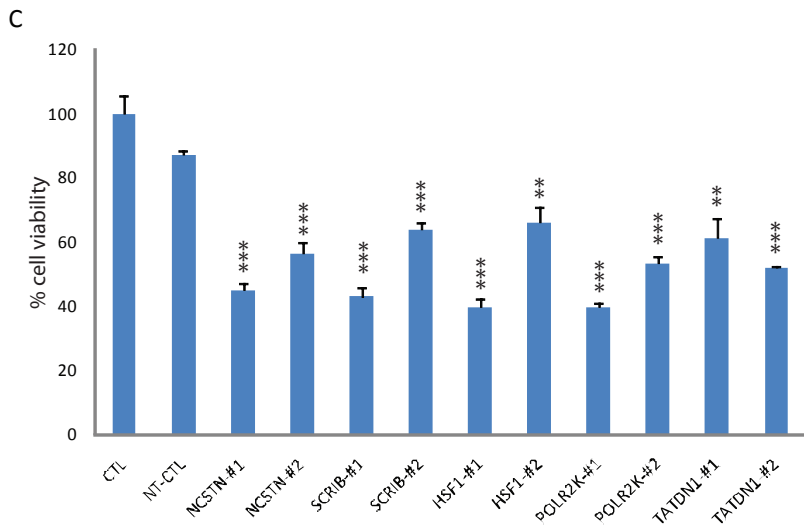

Supplement: NIHMS99658-supplement-Fig__S3.pdf [file NIHMS99658-supplement-Fig__S3.pdf]
